# Supplementary material
Source: PubMed Central journal article supplement (PMC7085414)
Supplement: NIHMS1574781-supplement-1.pdf [file NIHMS1574781-supplement-1.pdf]

**Cell Reports, Volume 30**

## **Supplemental Information**

### **MYC Dysregulates Mitosis, Revealing**

#### **Cancer Vulnerabilities**

**Julia Rohrberg, Daniel Van de Mark, Meelad Amouzgar, Joyce V. Lee, Moufida Taileb, Alexandra Corella, Seda Kilinc, Jeremy Williams, Marie-Lena Jokisch, Roman Camarda, Sanjeev Balakrishnan, Rama Shankar, Alicia Zhou, Aaron N. Chang, Bin Chen, Hope S. Rugo, Sophie Dumont, and Andrei Goga**

## Supplemental tables

**Table S1. MYC regulates the expression of mitotic spindle genes, related to Figure 3 and**

**Table S2.** Twenty-seven mitotic genes expressed in a MYC-dependent manner in different model systems and datasets (**see Figure 3G**). We examined occupancy of their promoters by MYC in three cell lines according to (Walz et al., 2014) and murine B-cell tumors according to (Sabò et al., 2014). CPC – Chromosomal passenger complex. SAC – spindle assembly checkpoint. APC – Anaphase promoting complex.

| Gene             | Function                                                      | MYC bound promoters |      |                |              |
|------------------|---------------------------------------------------------------|---------------------|------|----------------|--------------|
|                  |                                                               | Walz et al.         |      |                | Sabò et al.  |
|                  |                                                               | T cells             | MEFs | Pancreas cells | B-cell tumor |
| Aurkb            | kinase, CPC, SAC, chromatin-induced microtubule stabilization | +                   | +    | +              | +            |
| Birc5 (Survivin) | CPC, localizes TPX2 to microtubules                           | +                   | +    | +              | +            |
| Bub1             | kinase, SAC                                                   | -                   | -    | +              | +            |
| Ccnb2            | cyclin, activates CDK1                                        | -                   | +    | +              | +            |
| Cdc20            | activates APC                                                 | +                   | +    | +              | +            |
| Cdca5            | sister chromatid cohesion                                     | na                  | na   | na             | +            |
| Cdca8            | chromatin-induced microtubule stabilization                   | +                   | +    | +              | +            |
| Cdt1             | kinetochore-microtubule attachments                           | +                   | +    | +              | +            |
| Cenpa            | centromere protein                                            | +                   | +    | -              | +            |
| Cenpf            | centromere protein                                            | +                   | +    | +              | +            |
| Chk1             | kinase, DNA damage checkpoint                                 | +                   | +    | +              | +            |
| Kif11 (Eg5)      | motor protein                                                 | +                   | +    | +              | +            |
| Kif14            | motor protein                                                 | na                  | na   | na             | +            |
| Kif15            | motor protein                                                 | -                   | -    | +              | +            |
| Kif18a           | motor protein, microtubule depolymerase                       | +                   | -    | +              | +            |
| Kif20a           | motor protein                                                 | -                   | +    | -              | +            |
| Kif2c            | motor protein, microtubule depolymerase                       | +                   | +    | +              | +            |
| Kifc1            | motor protein                                                 | +                   | +    | +              | -            |
| Melk             | kinase                                                        | na                  | na   | na             | +            |
| Mybl2            | transcription factor                                          | +                   | +    | +              | +            |
| Plk1             | mitotic kinase                                                | -                   | +    | +              | +            |
| Pscc1            | microtubule depolymerase recruitment                          | -                   | +    | -              | +            |
| Stmn1            | microtubule destabilization                                   | +                   | +    | +              | +            |

|       |                                                       |   |   |   |   |
|-------|-------------------------------------------------------|---|---|---|---|
| Tpx2  | acentrosomal microtubule nucleation, AURKA activation | + | + | + | + |
| Ttk   | kinase, centrosome duplication, AURKB activation      | + | + | + | + |
| Ube2c | ubiquitin ligase, APC                                 | + | + | + | + |
| Ube2s | ubiquitin ligase, APC                                 | + | + | + | + |

## Supplemental Figures

**Figure S1**

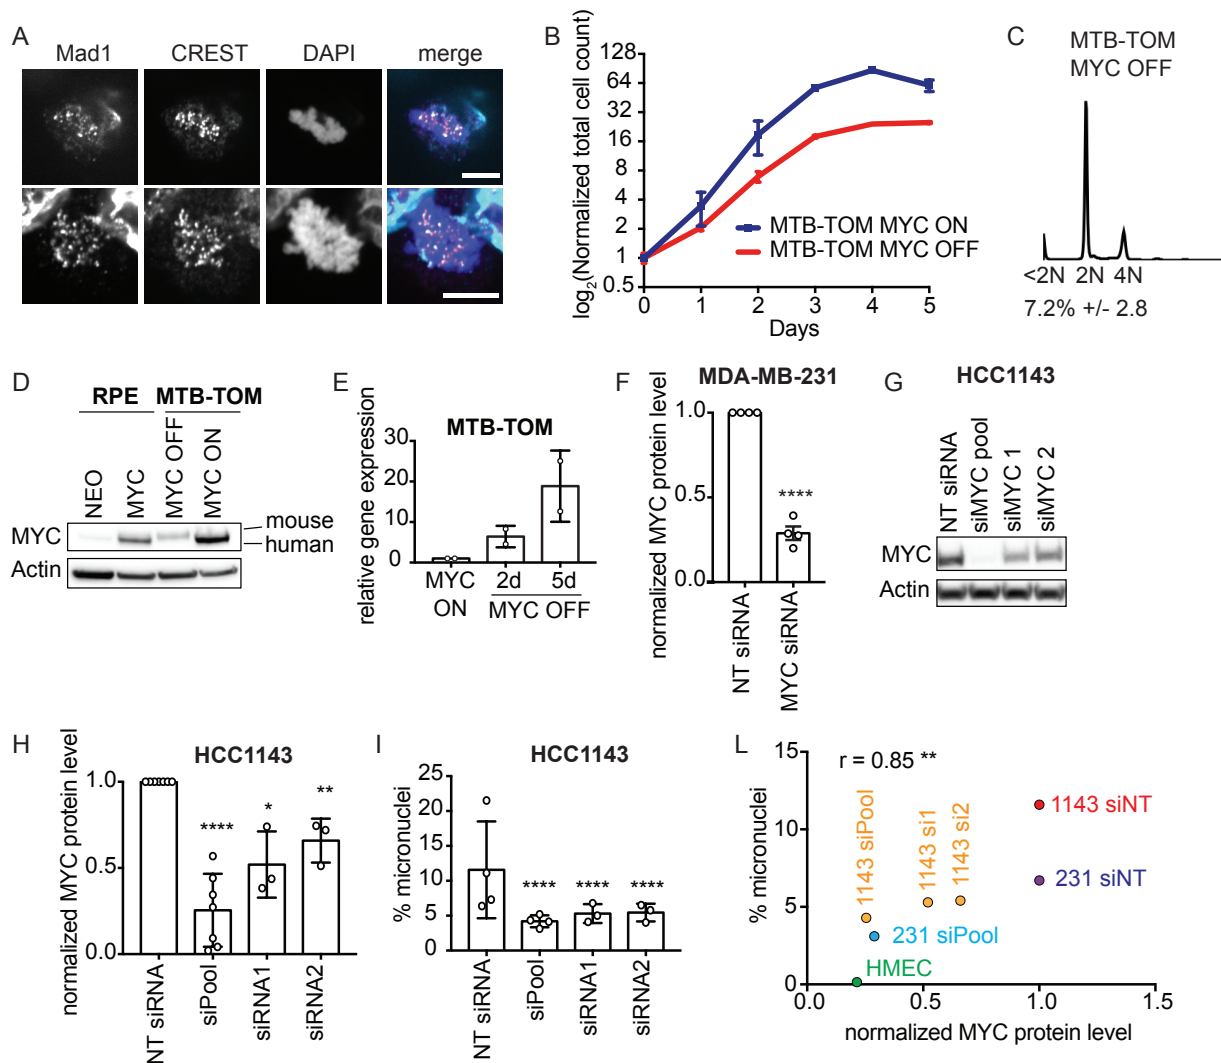

**Figure S1. MYC reversibly induces CIN and characterization of the MTB-TOM cell line, related to Figure 1 and STAR Methods.** **A** Mad1 localizes to kinetochores indicating an active SAC. Staining of RPE-MYC cells with anti-Mad1, anti-CREST (kinetochores) and DAPI (DNA). Co-localization of Mad1 and CREST staining is observed. **B** Growth curve of MTB-TOM MYC ON and MYC OFF. Mean  $\pm$  S.D.,  $n=3$ . **C** Cell cycle profile of MTB-TOM MYC OFF for three days. Sub 2N DNA content, mean  $\pm$  S.D.,  $n=6$ . **D** Western blot of MYC in human RPE-NEO and RPE-MYC and murine MTB-TOM MYC ON and MYC OFF for three days. The anti-MYC

Y69 antibody recognizes a slightly smaller product for the human protein but has the same affinity for both mouse and human (Lehmann et al., 2012). **E** Relative expression of murine MYC measured by quantitative PCR in MTB-TOM MYC ON and MYC OFF. Mean, S.D., n=2. **F** MYC protein level in MDA-MB-231 cells three days after treatment with non-targeting (NT) siRNA or MYC siRNA normalized to beta-actin. Mean +/- S.D., unpaired t-test, n=4. **G-I** MYC protein level in HCC1143 three days after treatment with non-targeting (NT), two single (siRNA1 and 2) or pooled siRNA (siPool). **G** Representative western blot of MYC. **H** MYC level normalized to beta-actin. Mean +/- S.D., unpaired t-test, n=3-7. **I** Percent of cells with micronuclei. Mean +/- S.D., Fisher's exact test, n=849-1437. **J** Correlation of MYC protein levels and percent of HCC1143 (1143) and MDA-MB-231 (231) cells and HMEC MYC OFF with micronuclei. Correlation coefficient was computed using Pearson correlation.

\* p<0.05, \*\* p< 0.01, \*\*\* p<0.001, \*\*\*\* p<0.0001.

**Figure S2**

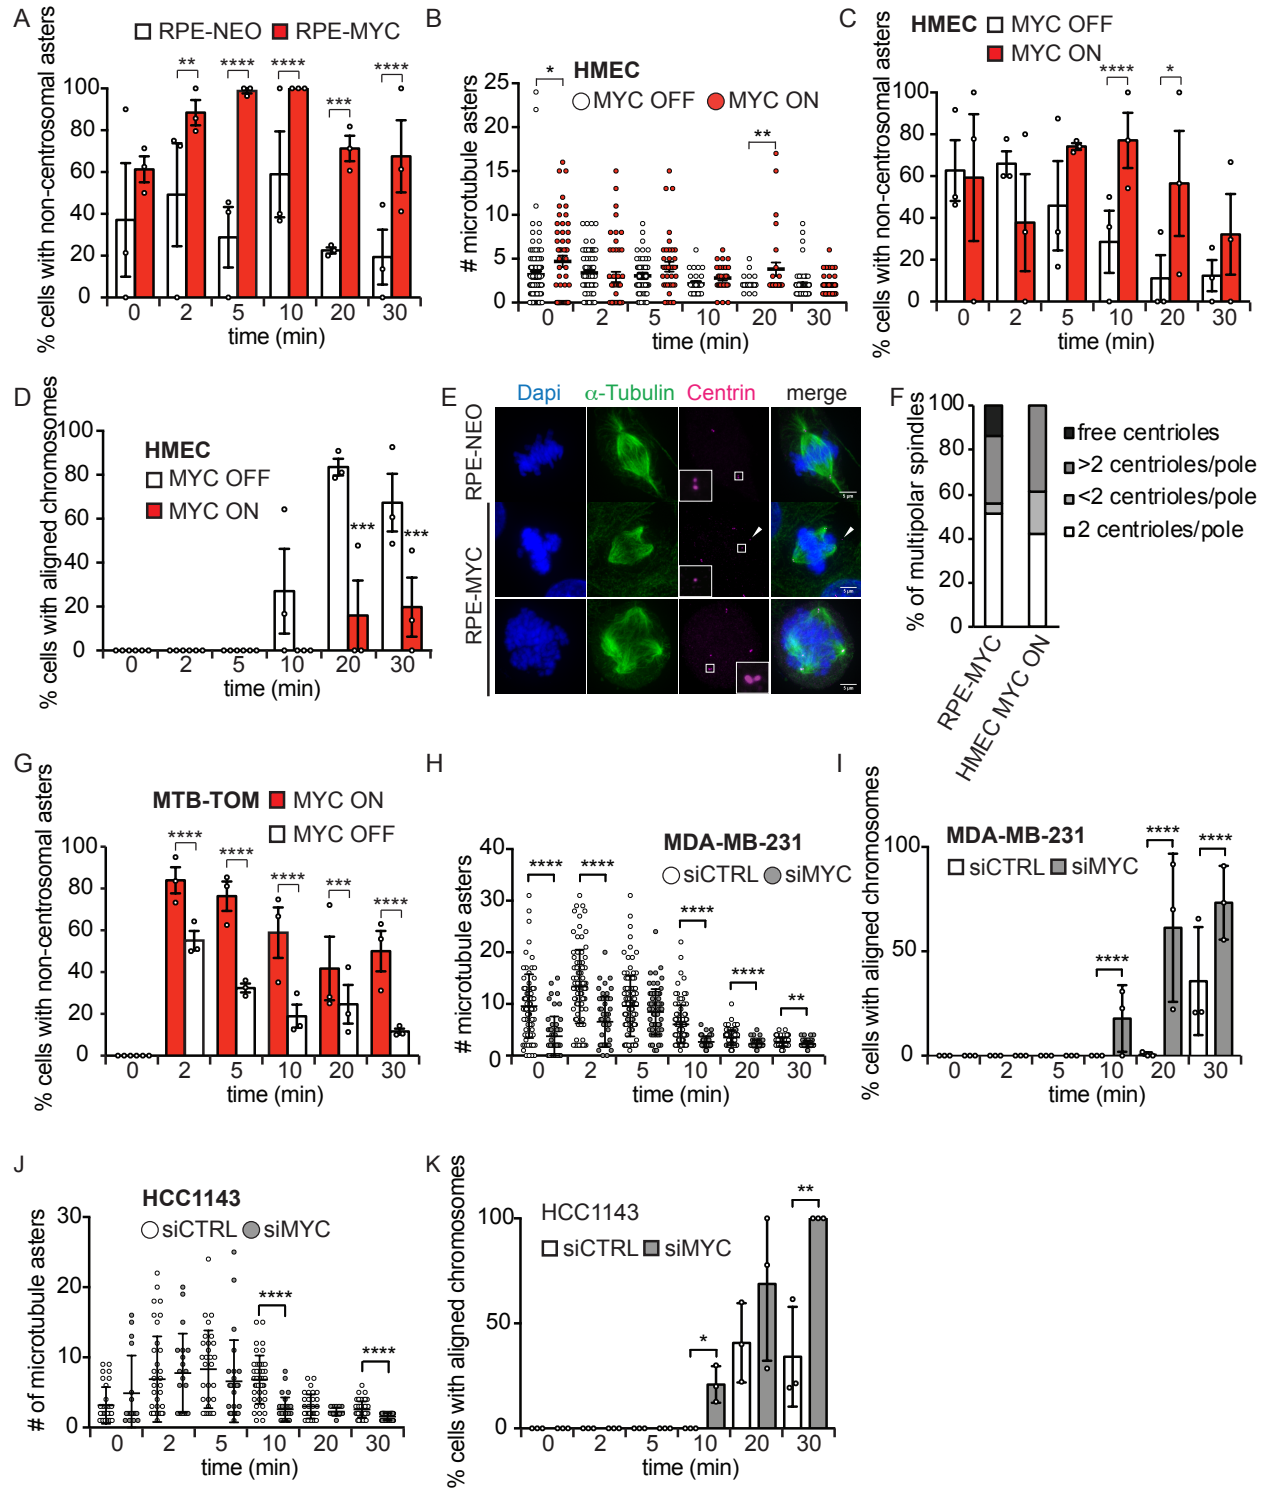

**Figure S2. MYC impairs mitotic spindle formation, related to Figure 2. A-D** Cells were fixed at the indicated time points after nocodazole washout and stained with anti- $\alpha$ -tubulin, anti- $\gamma$ -

tubulin, anti-CREST (kinetochores) and DAPI (DNA). **A** Percent RPE-NEO and RPE-MYC cells with non-centrosomal microtubule asters. Mean  $\pm$  S.E.M. Fisher's exact test, n=26-99 from three independent experiments. **B** Number of microtubule asters in HMEC MYC OFF and MYC ON. Mean  $\pm$  S.E.M. t-test, n=29-101 from three independent experiments. **C** Percent HMEC cells with non-centrosomal microtubule asters. Mean  $\pm$  S.E.M. Fisher's exact test, n=29-101 from three independent experiments. **D** Percentage of HMEC cells with aligned chromosomes. Mean  $\pm$  S.E.M. Fisher's exact test, n=29-101 from three independent experiments. At 30 minutes,  $17\% \pm 8.8$  of HMEC MYC OFF cells enter anaphase. **E** Representative confocal micrographs of RPE-NEO and RPE-MYC cells stained with anti- $\alpha$ -tubulin, anti-centrin and DAPI (DNA). Insets show centrosomes with two centrioles (upper row, RPE-NEO), one centriole (middle row, RPE-MYC) and three centrioles (lower row, RPE-MYC). Arrow: free centriole that is not associated with a spindle pole. Scale bar 5  $\mu$ m. **F** Percent multipolar RPE-MYC and HMEC MYC ON cells with free centrioles, two, more than two and less than two centrioles per pole quantified from confocal micrographs. Mean, n=59-141. **G** Percent MTB-TOM MYC ON and MYC OFF for three days with non-centrosomal microtubule asters. Mean  $\pm$  S.E.M, Fisher's exact test, n=80-208 from three independent experiments. **H-K** Nocodazole wash-out assay in breast cancer cell lines. **H** Number of microtubule asters in MDA-MB-231 cells. Mean  $\pm$  S.E.M. t-test, n=47-106 from three independent experiments. **I** Percentage of MDA-MB-231 cells with aligned chromosomes. Mean  $\pm$  S.D. Fisher's exact test, n=47-106 from three independent experiments. **J** Number of microtubule asters in HCC1143 cells. Mean  $\pm$  S.E.M. t-test, n=17-51 from three independent experiments. **K** Percentage of HCC1143 with aligned chromosomes. Mean  $\pm$  S.D. Fisher's exact test, n=17-51 from three independent experiments.

\*  $p < 0.05$ , \*\*  $p < 0.01$ , \*\*\*  $p < 0.001$ , \*\*\*\*  $p < 0.0001$ .

Figure S3

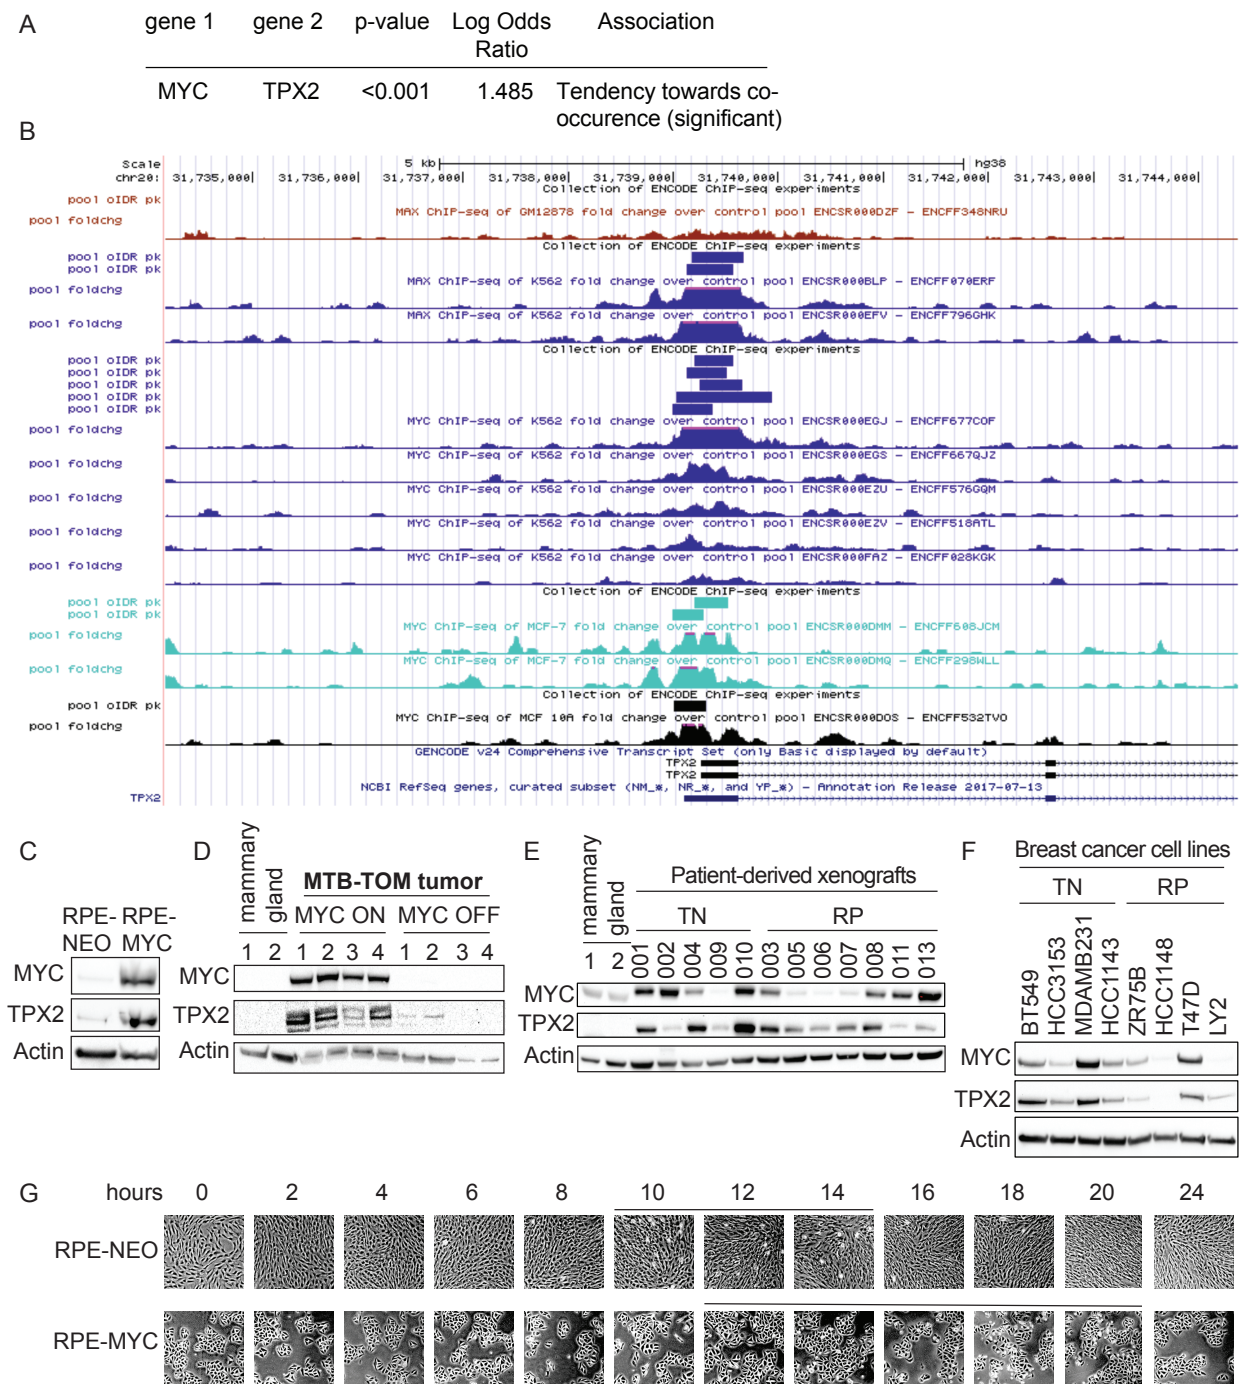

**Figure S3. Correlation between TPX2 and MYC expression, related to Figure 4. A** MYC and TPX2 mRNA correlation in human breast cancer. Data were obtained from cBioportal, Breast Invasive Carcinoma (TCGA, provisional, 960 samples). **B** ChIP sequencing data for MYC and

MAX binding to the promoter region of TPX2 (chr20:31,734,166-31,744,376) from the ENCODE project (human Dec 2013 (GRCh38/hg38) assembly). **C-F** Representative western blots of MYC and TPX2 in **C** RPE-NEO and RPE-MYC, **D** MTB-TOM tumors from four mice on doxycycline diet (MYC ON), four tumors from mice that were off doxycycline for three days (MYC OFF) and two non-tumor mammary glands (N1 and N2), **E** patient-derived xenograft tumors and mouse mammary gland (N1 and N2) and **F** triple-negative (TN) and receptor positive (RP) breast cancer cell lines. **G** Micrographs of RPE-NEO (top) and RPE-MYC (bottom) cells taken every two hours after release from a double thymidine block. The appearance of mitotic cells is indicated with a bar for each cell line.

**Figure S4**

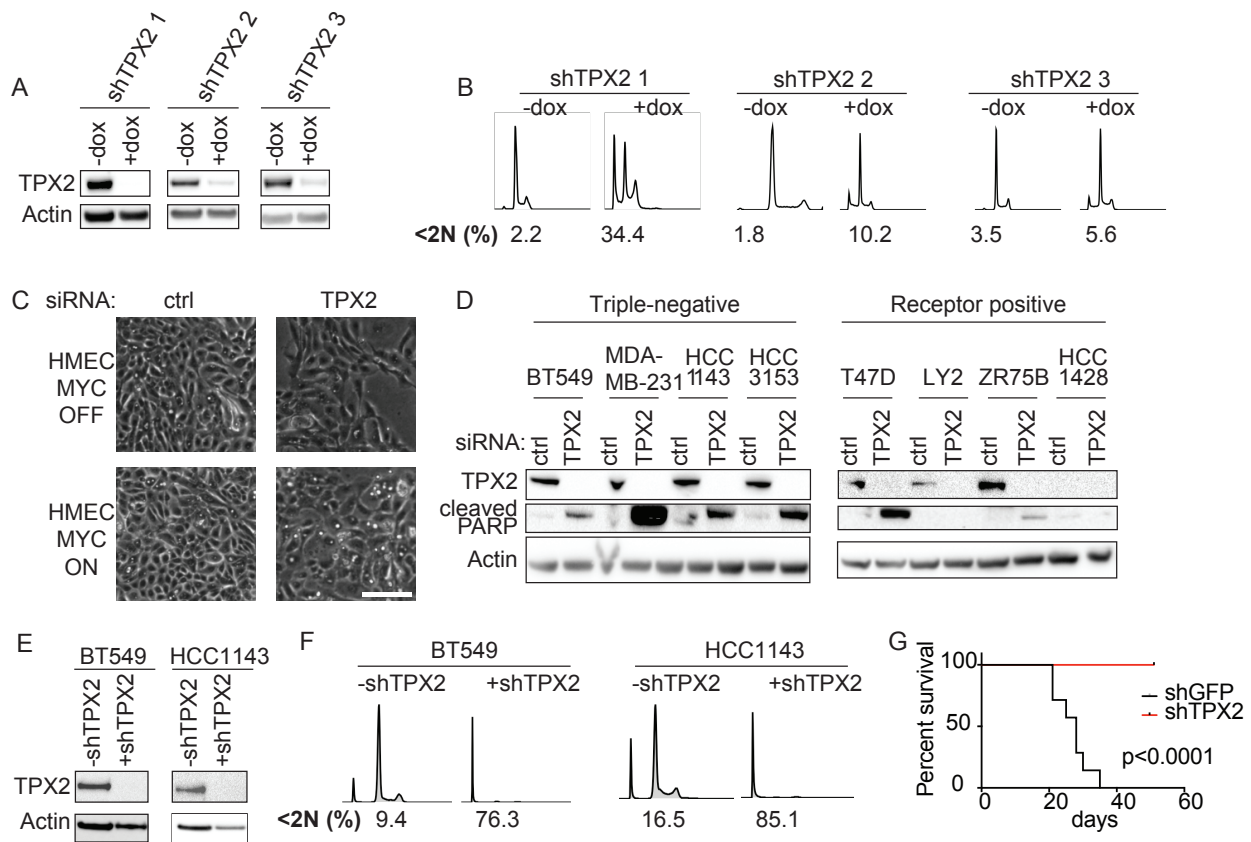

**Figure S4. TPX2 is required for the survival of MYC high cells, related to Figure 5.**

**A and B** Western blots (**A**) and cell cycle profiles with sub2N quantification (**B**) of RPE-MYC cells expressing three different doxycycline-inducible shRNAs against TPX2 (shTPX2 1 – 3) three days after adding doxycycline. **C** Micrographs of HMEC MYC OFF and MYC ON for two days, three days after transfection with control (ctrl) or TPX2 siRNA. **D** Western blot of breast cancer cell lines three days after transfection with control (ctrl) or TPX2 siRNA. **E and F** Western blots (**E**) and cell cycle profiles (**F**) of BT549 and HCC1143 cells expressing doxycycline-inducible shTPX2 1 three days after adding doxycycline. **G** Kaplan-Meier survival curve of BT549 xenograft tumor mice following the indicated shRNA expression.

**Figure S5**

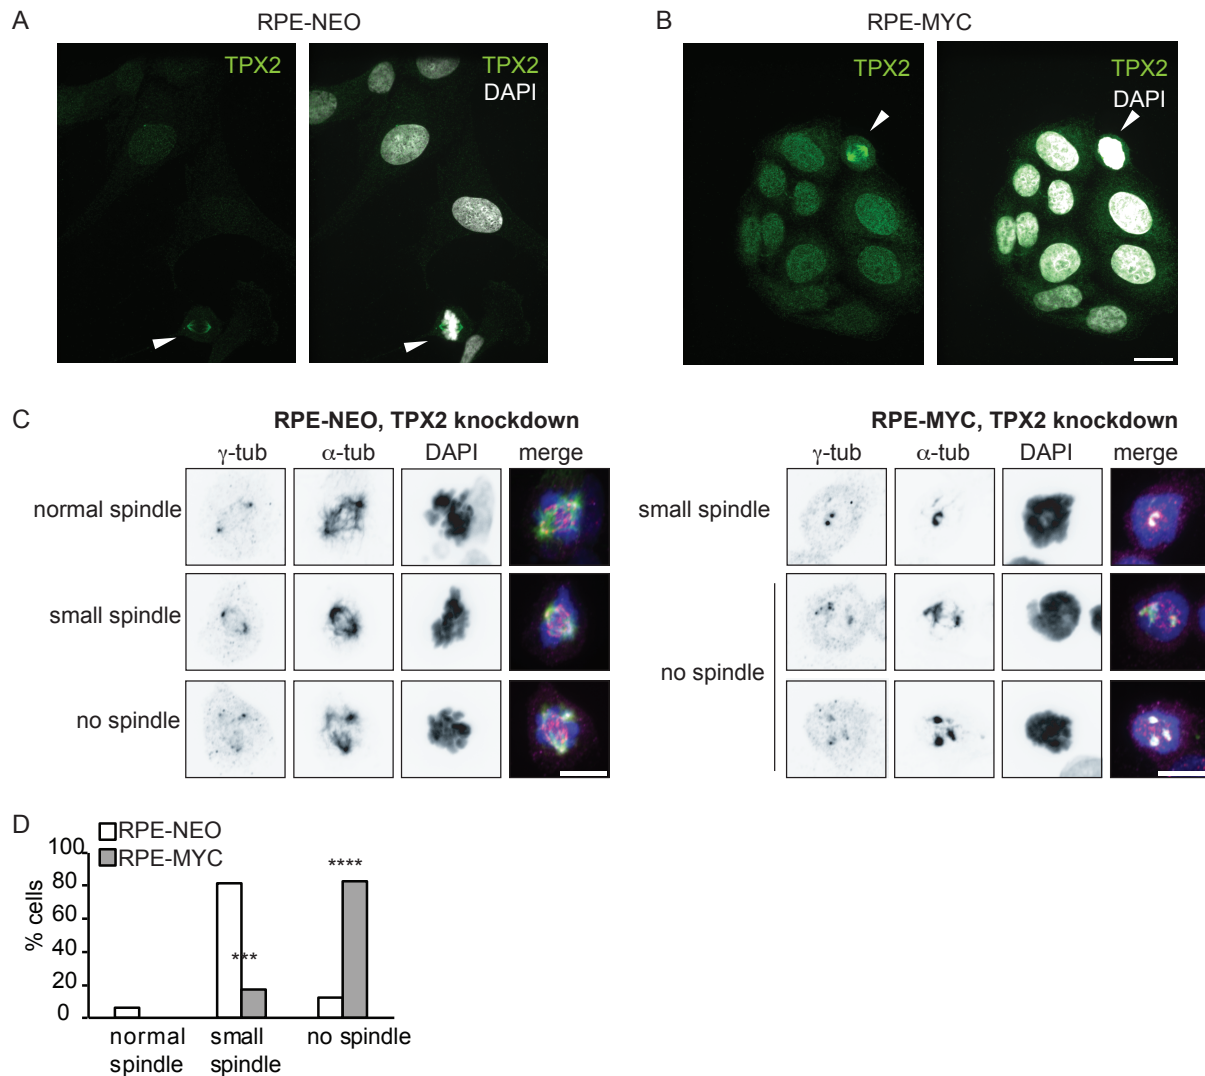

**Figure S5. TPX2 protects mitotic spindle function in MYC high cells, related to Figure 6. A**

**and B** Confocal micrographs of RPE-NEO (**A**) and RPE-MYC cells (**B**), fixed and stained with an antibody against TPX2 (green) and DAPI (white). **C** Representative confocal micrographs of asynchronously growing RPE-NEO (left) and RPE-MYC (right) 18 hours after transfection with TPX2 siRNA. Cells were fixed and stained with anti- $\alpha$ -tubulin, anti- $\gamma$ -tubulin and DAPI (DNA). Scale bar, 10  $\mu$ m. **D** Percent RPE-NEO and RPE-MYC cells with normal, small or no spindles 12 hours after transfection with TPX2 siRNA. Mean, Fisher's exact test, n=16 and 23 from two independent experiments. \*\*\* p<0.001, \*\*\*\* p<0.0001.
